# Supplementary material for: Sustainable valorization of tannery hair waste into keratin by an acoustic cavitation-assisted process using a green solvent
Source: Research Square preprint supplement (doi:10.21203/rs.3.rs-7252336/v1), 2025-09-12
Supplement: Supplementary file 2 [file 6d3dca9272e43e94d945f1fb.docx]

**Highlights for review**

1. A novel acoustic cavitation-assisted method for keratin extraction from hair waste
2. Keratin recovery with relatively high yield and preserved protein structure
3. Extracted keratin native structure confirmed by various analytical techniques
4. Extracted keratin exhibits high thermal stability
5. Ionic liquid recovery enables reuse, enhancing process sustainability
