# Supplementary figures and images for: Sustainable valorization of tannery hair waste into keratin by an acoustic cavitation-assisted process using a green solvent
Source: Research Square preprint supplement (doi:10.21203/rs.3.rs-7252336/v1), 2025-09-12

**Graphical abstract**


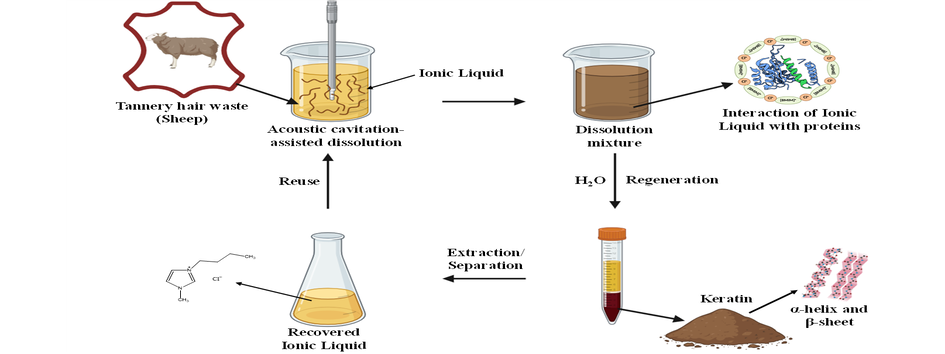

Supplement: Supplementary file 1 [file 4ad51642bb2cc18f6cfed910.docx]
